1 **A novel method for single whitefly (*Bemisia tabaci*) transcriptomes reveals an**  
2 **eleven amino acid deletion in the *NusG* protein in the bacterial**  
3 **endosymbiont *Portiera aleyrodidarum***

4  
5 \*Sseruwagi, P.<sup>1</sup>, \*Wainaina, J.M.<sup>2,8</sup>, Ndunguru, J.<sup>1</sup>, Tumuhimbise, R.<sup>3</sup>, Tairo, F.<sup>1</sup>, Guo, J.<sup>4,5</sup>,  
6 Vrielink, A.<sup>2</sup>, Blythe, A.<sup>2</sup>, Kinene, T.<sup>2,8</sup>, De Marchi, B.<sup>2,6,8</sup>, Kehoe, M.A.<sup>7</sup>, Tanz, S.K.<sup>8</sup>, and Boykin,  
7 L.M.<sup>2,8,9</sup>

8 \* P. Sseruwagi and J. M. Wainaina are joint first authors on this manuscript.

9 **Addresses**

10 <sup>1</sup>Mikocheni Agriculture Research Institute (MARI), P.O. Box 6226, Dar es Salaam, Tanzania

11 <sup>2</sup>School of Molecular Sciences, University of Western Australia, Crawley, Perth, WA 6009,  
12 Australia

13 <sup>3</sup>National Agricultural Research Laboratories, Kawanda, P.O. Box 7065, Kampala, Uganda

14 <sup>4</sup>Ministry of Agriculture Key Laboratory of Agricultural Entomology, Institute of Insect  
15 Sciences, Zhejiang University, Hangzhou 310058, China

16 <sup>5</sup>State Key Laboratory for the Biology of Plant Diseases and Insect Pests, Institute of Plant  
17 Protection, Chinese Academy of Agricultural Sciences, Beijing 100193, China

18 <sup>6</sup>UNESP – Faculdade de Ciências Agrônômicas, Botucatu, Brazil

19 <sup>7</sup>Crop Protection Branch, Departments of Agriculture and Food Western Australia, South  
20 Perth, WA 6151, Australia

21 <sup>8</sup>ARC Centre of Excellence in Plant Energy Biology, The University of Western Australia,  
22 Perth, 6009, Western Australia, Australia

23 <sup>9</sup> Author for correspondence: [laura.boykin@uwa.edu.au](mailto:laura.boykin@uwa.edu.au)

24 **Abstract**

25 **Background:** *Bemisia tabaci* species (whiteflies) are the world's most devastating insect  
26 pests within crops in the tropics. They cause billions of dollars (US) of damage each year and  
27 are leaving farmers in the developing world food insecure. Understanding the genetic and  
28 transcriptomic composition of these insect pests, the viruses they transmit and the  
29 microbiota is crucial to sustainable insect and virus management solutions for farmers.  
30 Currently, publically available transcriptome data for *B. tabaci* has been generated from  
31 pooled samples (mainly inbred lab colonies) consisting of several individuals because  
32 whiteflies are small (approximately 0.2 mm wide and 0.1 mm in height). Pooling individuals  
33 can lead to high heterozygosity and skewed representation of the genetic diversity. The  
34 ability to extract enough RNA from a single whitefly has remained elusive due to their small  
35 size and technology limitations. Therefore, the understanding of whitefly-microbiota-viral  
36 species composition of an individual field-collected whitefly has also remained unknown. In  
37 this study, we developed a single whitefly RNA extraction procedure and subsequently  
38 successfully sequenced the transcriptome of four individual adult Sub-Saharan Africa (SSA1)  
39 *B. tabaci*.

40 **Results:** Transcriptome sequencing on individual whiteflies resulted in between 39-42  
41 million raw reads. *De novo* assembly of trimmed reads yielded between 65,000-162,000  
42 transcripts across all four *B. tabaci* transcriptomes. In addition, Bayesian phylogenetic  
43 analysis of mitochondrion cytochrome I oxidase (mtCOI) grouped the four whiteflies within  
44 the SSA1 clade. BLAST searches on assembled transcripts within the four individual  
45 transcriptomes identified five endosymbionts; the primary endosymbiont *Portiera*  
46 *aleyrodidarum* and four secondary endosymbionts: *Arsenophonus*, *Wolbachia*, *Rickettsia*,  
47 and *Cardinium spp.* These five endosymbionts were predominant across all four SSA1 *B.*

48 *tabaci* study samples with prevalence levels of between 54.1-75%. Nucleotide and amino  
49 acid sequence alignments of the *NusG* gene of *P. aleyrodidarum* for the SSA1 *B. tabaci*  
50 transcriptomes of samples WF2 and WF2b revealed an eleven amino acid residue deletion  
51 that was absent in samples WF1 and WF2a. Comparison of the protein structure of the  
52 *NusG* protein from *P. aleyrodidarum* in SSA1 with known *NusG* structures showed the  
53 deletion resulted in a shorter D loop. Although *NusG* is key in regulating of transcription  
54 elongation, it is believed that the shortening of the loop region in the N-terminal domain is  
55 unlikely to affect transcription termination. Therefore, the effect of variability in this region  
56 across species is unknown.

57 **Conclusion:** In this study, we optimised a single whitefly high quality RNA extraction  
58 procedure and successfully carried out individual whitefly transcriptome sequencing on  
59 adult *B. tabaci* whiteflies. This enabled the detection of unique genetic differences in the  
60 *NusG* genes of the primary endosymbiont *P. aleyrodidarum* in four field-collected SSA1  
61 whiteflies that may not have been detected using lab-pooled *B. tabaci* isolines. The use of  
62 field-collected specimens means that both time and money will be saved in future studies  
63 using single whitefly transcriptomes in monitoring vector and viral interactions. In addition,  
64 the methods we have developed here are applicable to any small organism where RNA  
65 quantity has limited transcriptome studies.

66 **Keywords:** Single whitefly, Transcriptomes, Amino acid, *NusG* protein, Bacterial  
67 endosymbiont, *Portiera aleyrodidarum*

68

## 69 **Background**

70 Members of the whitefly *Bemisia tabaci* (Hemiptera: Aleyrodidae) species complex are  
71 classified as the world's most devastating insect pests. There are 34 species globally [1] and  
72 the various species in the complex are morphologically identical. They transmit over 100  
73 plant viruses [2, 3], become insecticide resistant [4], and ultimately cause billions of dollars  
74 in damage annually for farmers. The adult whiteflies are promiscuous feeders and will move  
75 between viral infected crops and native weeds that act as viral inoculum 'sources' and  
76 deposit viruses to alternative crops that act as viral 'sinks' while feeding.

77

78 The crop of importance for this study was cassava (*Manihot esculenta*). Cassava supports  
79 approximately 800 million people in over 105 countries as a source of food and nutritional  
80 security, especially within rural smallholder farming communities [5]. Cassava production in  
81 Sub Saharan Africa (SSA), especially the East Africa region is hampered by both DNA and  
82 RNA transmitted viruses.

83

84 Whitefly-transmitted viruses cause cassava mosaic disease (CMD) leading to 28-40% crop  
85 losses with estimated economic losses of up to \$ 2.7 billion dollars per year in SSA [6]. The  
86 CMD pandemics in East Africa, and across other cassava producing areas in SSA were  
87 correlated with *B. tabaci* outbreaks [7]. African cassava mosaic viruses (ACMVs) occur  
88 mostly towards West Africa where a distinct group of *B. tabaci* SSA1 is predominant. On the  
89 other hand, East African cassava mosaic viruses (EACMVs) occur mainly in coastal areas of  
90 East Africa with highest diversity inland in Kenya, Tanzania and Uganda, yet again with a  
91 different group of *B. tabaci* SSA1. The two distinct groups of SSA1 are yet to be named.

92 While some studies have been carried out to determine the relative transmission of CMDs

93 by different *B. tabaci* species with indications of no significant differences, it is still not clear  
94 why some CMDs such as African cassava mosaic viruses (ACMVs) and East African cassava  
95 mosaic – Uganda variant (EACMV-UG), which is a recombinant between EACMV and ACMV  
96 in the coat protein (CP), do not occur in coastal East Africa.

97

98 Relevant to this study are two RNA *Potyvirus*s: the Cassava Brown Streak viruses (CBSV)  
99 and the Uganda Cassava Brown Streak Virus (UCBSV) both devastating cassava in East Africa.

100 *Bemisia tabaci* species have been hypothesized to transmit these RNA viruses with limited  
101 transmission efficiency [8,9]. Recent studies have shown that there are multiple species of  
102 these viruses [10], which further strengthens the need to obtain data from individual  
103 whiteflies as pooled samples could contain different species with different virus  
104 composition and transmission efficiency. In addition, CBSV has been shown to have a higher  
105 rate of evolution than UCBSV [11] increasing the urgency of understanding the role played  
106 by the different whitefly species in the system.

107

#### 108 ***Endosymbionts and their role in B. tabaci***

109 Viral-vector interactions within *B. tabaci* are further influenced by bacterial endosymbionts  
110 forming a tripartite interaction. *B. tabaci* has one of the highest numbers of endosymbiont  
111 bacterial infections with eight different vertically transmitted bacteria reported [12, 13], [14,  
112 15]. They are classified into two categories; primary (P) and secondary (S) endosymbionts,  
113 many of which are in specialised cells called bacteriocytes, while a few are also found  
114 scattered throughout the whitefly body. A single obligate *P-symbiont* *P. aleyrodidarum* is  
115 systematically found in all *B. tabaci* individuals. *P. aleyrodidarum* is essential for whitefly  
116 survival as it supplies and complements the host metabolic activities in the synthesis of the

117 essential amino acids threonine and tryptophan along with the non-essential amino acid  
118 serine [16]. *Portiera* has long co-evolutionary history with all members of the *Aleyrodinae*  
119 subfamily [16]. Although it is yet to be confirmed in whiteflies, most P-symbionts have been  
120 characteristically shown to have reduced and static genomes [17]. In this study, we further  
121 explore genes within the *P. aleyrodidarum* retrieved from individual whitefly  
122 transcriptomes, including the transcription termination/antitermination protein *NusG*. *NusG*  
123 is a highly conserved protein regulator that suppresses RNA polymerase pausing and  
124 increasing the elongation rate. However, its importance within gene regulation is species  
125 specific; in *Staphylococcus aureus* it is dispensable [18, 19].

126

127 The S-endosymbionts are not systematically associated with hosts and their contribution is  
128 not essential to the survival and reproduction. Seven facultative S-endosymbionts,  
129 *Wolbachia*, *Cardinium*, *Rickettsia*, *Arsenophonus*, *Hamiltonella defensa* and *Fritschea*  
130 *bemisiae* have been detected in various *B. tabaci* populations [20, 21, 12, 22, 23]. The  
131 presence of S-endosymbionts can influence key biological parameters of the host.  
132 *Hamiltonella* and *Rickettsia* facilitate plant virus transmission with increased acquisition and  
133 retention by whiteflies [24]. This is done by protection and safe transit of virions in  
134 haemolymph of insects through chaperonins (*GroEL*) and protein complexes that aid in  
135 protein folding and repair mechanisms [21].

136

### 137 ***Application of next generation sequencing in pest management of B. tabaci***

138 The advent of next generation sequencing (NGS) and specifically transcriptome sequencing  
139 has allowed the unmasking of this tripartite relationship of vector-viral-microbiota within  
140 insects [25, 26, 27]. Furthermore, NGS provides an opportunity to better understand the co-

141 evolution of *B. tabaci* and its bacterial endosymbionts [28]. The endosymbionts have been  
142 implicated in influencing species complex formation in *B. tabaci* through conducting sweeps  
143 on the mitochondrial genome [29]. Applying transcriptome sequencing is essential to reveal  
144 the endosymbionts and their effects on the mitogenome of *B. tabaci* and predict potential  
145 hot spots for changes that are endosymbionts induced.

146

147 Several studies have explored the interaction between whitefly and endosymbionts and  
148 have resulted in the identification of candidate genes that maintain the relationship [30,31].  
149 This has been explored as a source of potential RNAi pesticide control targets [32, 31, 32,  
150 28]. RNAi-based pest control measures also provide opportunities to identify species-  
151 specific genes for target gene sequences for knock-down. However, to date all  
152 transcriptome sequencing has involved pooled samples obtained through rearing several  
153 generations of isolines of a single species to ensure high quantities of RNA for subsequent  
154 sequencing. This remains a major bottle neck in particular within arthropoda where  
155 collected samples are limited due to small morphological sizes [33, 34]. In addition, the  
156 development of isolines is time consuming and often has colonies dying off mainly due to  
157 inbreeding depression [35].

158

159 It is against this background that we sought to develop a method for single whitefly  
160 transcriptomes to understand the virus diversity within different whitefly species. We did  
161 not detect viral reads, probably an indication that the sampled whitefly was not carrying any  
162 viruses, but as proof of concept of the method, we validated the utility of the data  
163 generated by retrieving the microbiota *P-endosymbionts* and *S-endosymbionts* that have  
164 previously been characterised within *B. tabaci* [36, 37] In this study we report the

165 endosymbionts present within field-collected individual African whiteflies and  
166 characterisation and evolution of the *NusG* genes present within the *P-endosymbionts*.

167

## 168 **Results**

### 169 ***RNA extraction and NGS optimised for individual B. tabaci samples***

170 In this study, we sampled four individual adult *B. tabaci* from cassava fields in Uganda (WF2)  
171 and Tanzania (WF1, WF2a, WF2b). Total RNA from single whitefly yielded high quality RNA  
172 with concentrations ranging from 69 ng to 244 ng that were used for library preparation and  
173 subsequent sequencing with Illumina Hiseq 2000 on a rapid run mode. The number of raw  
174 reads generated from each single whitefly ranged between 39,343,141 and 42,928,131  
175 (Table 1). After trimming, the reads were assembled using Trinity resulting into 65,550 to  
176 162,487 transcripts across the four SSA1 *B. tabaci* individuals (Table 1).

177

### 178 ***Comparison of endosymbionts within the SSA1 B. tabaci samples***

179 Comparison of the diversity of bacterial endosymbionts across individual whitefly transcripts  
180 was conducted with BLASTn searches on the non-redundant nucleotide database and by  
181 identifying the number of genes from each bacterial endosymbiont (Supplementary Table.  
182 1). We identified five main endosymbionts including: *P. aleyrodidarum* the primary  
183 endosymbionts and four secondary endosymbionts: *Arsenophonus*, *Wolbachia*, *Rickettsia*  
184 *sp*, and *Cardinium* spp (Table 2). *P. aleyrodidarum* predominated all four SSA1 *B. tabaci*  
185 study samples with incidences of 74.8%, 71.2%, 54.1% and 58.5% for WF1, WF2, WF2a and  
186 WF2b, respectively. This was followed by *Arsenophonus*, *Wolbachia*, *Rickettsia sp*, and  
187 *Cardinium* spp, which occurred at an average of 18.0%, 5.9%, 1.6% and <1%, respectively  
188 across all four study samples.



189

190 ***Phylogenetic analysis of single whitefly mitochondrial cytochrome oxidase I (COI)***

191 *B. tabaci* is recognized as a species complex of 34 species based on the mitochondrion  
192 cytochrome oxidase I [38, 1, 39]. We therefore used cytochrome oxidase I (COI) transcripts  
193 of the four individual whitefly to ascertain *B. tabaci* species status and their phylogenetic  
194 relation using reference *B. tabaci* COI GenBank sequences found at [www.whiteflybase.org](http://www.whiteflybase.org).  
195 All four COI sequences clustered within Sub Saharan Africa clade 1 (SSA1) species (data not  
196 shown).

197

198 ***Sequence alignment and Bayesian phylogenetic analysis of NusG gene***

199 Nucleotide and amino acid sequence alignments of the *NusG* in *P. aleyrodidarum* were  
200 conducted for several whitefly species including: *B. tabaci* (SSA1, Mediterranean (MED) and  
201 Middle East Asia Minor 1 (MEAM1) New World 2 (NW2), *T. vaporariorum* (Greenhouse  
202 whitefly) and *Alerodicus dispersus*. The alignment identified 11 missing amino acids in the  
203 *NusG* sequences for the SSA1 *B. tabaci* samples: WF2 and WF2b, *T. vaporariorum*  
204 (Greenhouse whitefly) and *Alerodicus disperses*. However, all 11 amino acids were present  
205 in samples WF1 and WF2a, MED, MEAM1 and NW2 (Fig. 1). Bayesian phylogenetic  
206 relationships of the *NusG* sequences of *P. aleyrodidarum* for the different whitefly species  
207 clustered all four SSA1 *B. tabaci* (WF1, WF2, WF2a and WF2b) within a single clade together  
208 with ancestral *B. tabaci* from GenBank (Fig. 2). The SSA1 clade was supported by posterior  
209 probabilities of 1 with *T. vaporariorum* and *Alerodicus*, which formed clades at the base of  
210 the phylogenetic tree (Fig. 2).

211

212 ***Structure analysis of Portiera NusG genes***

213 Structures of the *NusG* protein sequence of the primary endosymbiont *P. aleyrodidarum* in  
214 the four SSA1 *B. tabaci* samples were predicated using Phyre2 with 100% confidence and  
215 compared to known structures of *NusG* from other bacterial species including (*Escherichia*  
216 *coli*, *Thermus thermophiles*, and *Aquifex aeolicus*; (PDB entries 2KO6, 1NZ8 and 1M1H,  
217 respectively) and Spt4/5 from yeast (*Saccharomyces cerevisiae*; PDB entry 2EXU) [18, 40,  
218 41]. The 11-residue deletion was found in a loop region that is variable in length and  
219 structure across bacterial species, but is absent from archaeal and eukaryotic species (Fig. 3  
220 and Fig. 4A). The effect of the deletion appears to shorten the loop in *NusG* from the African  
221 whiteflies (WF2 and WF2b). A model of bacterial RNA polymerase (orange surface  
222 representation; PDB entry 2O5I) bound to the N-terminal domain of the *T. thermophiles*  
223 *NusG* shows that the loop region is not involved in the interaction between *NusG* and RNA  
224 polymerase (Fig. 4B).

225

## 226 Discussion

227 In this study, we developed a single whitefly RNA extraction method for field-collected  
228 samples. We subsequently successfully conducted transcriptome sequencing on individual  
229 Sub-Saharan Africa 1 (SSA1) *B. tabaci*, revealing unique genetic diversity in the bacterial  
230 endosymbionts as proof of concept.

231

### 232 ***NusG* deletion and implications within *P. aleyrodidarum* in SSA *B. tabaci***

233 We report the presence of the primary endosymbionts *P. aleyrodidarum* and several  
234 secondary endosymbionts within SSA1 transcriptome. Furthermore, *P. aleyrodidarum* in  
235 SSA1 *B. tabaci* was observed to have a deletion of 11 amino acids on the *NusG* gene that is

236 associated with cellular transcriptional processes within another bacteria species. On the  
237 other hand, *P. aleyrodidarum* from NW2, MED and SSA1 (WF2a, WF1) *B. tabaci* species did  
238 not have this deletion (Fig. 1). The deleted 11 amino acids were identified in a loop region of  
239 the N-terminal domain of *NusG* protein resulting in a shortened loop in the SSA1 WF2b  
240 sample. This loop region has high variability in both structure and length across bacterial  
241 species and is absent from archaea and eukaryotic species.

242

243 *NusG* is highly conserved and a major regulator of transcription elongation. It has been  
244 shown to directly interact with RNA polymerase to regulate transcriptional pausing and rho-  
245 dependent termination [19, 42, 18, 43]. Structural modelling of *NusG* bound to RNA  
246 polymerase indicated that the shortened loop region seen in the WF2b sample is unlikely to  
247 affect this interaction. Rho-dependant termination has been attributed to the C-terminal  
248 (KOW) domain region of *NusG*, therefore a shortening of the loop region in the N-terminal  
249 domain is also unlikely to affect transcription termination. Yet, there has been no function  
250 attributed to this loop region of *NusG*, and thus the effect of variability in this region across  
251 species is unknown. However, the deletion could represent the result of evolutionary  
252 species divergence. Further sequencing of the gene is required across the *B. tabaci* species  
253 complex to gain further understanding of the diversity.

254

### 255 ***Why the single whitefly transcriptome approach?***

256 The sequencing of the whitefly transcriptome is crucial in understanding whitefly-  
257 microbiota-viral dynamics and thus circumventing the bottlenecks posed in sequencing the  
258 whitefly genome. The genome of whitefly is highly heterozygous [44]. Assembling of  
259 heterozygous genomes is complex due to the de Bruijn graph structures predominantly used

260 [45]. To deal with the heterozygosity, previous studies have employed inbred lines obtained  
261 from rearing a high number of whitefly isolines [46, 44, 33]. However, rearing whitefly  
262 isolines is time consuming and often colonies may suffer contaminations, leading to collapse  
263 and failure to raise the high numbers required for transcriptome sequencing.

264

265 We optimised the ARCTURUS® PicoPure® kit (Arcturus, CA, USA) protocol for individual  
266 whitefly RNA extraction with the dual aim of determining if we could obtain sufficient  
267 quantities of RNA from a single whitefly for transcriptome analysis and secondly, determine  
268 whether the optimised method would reveal whitefly microbiota as proof of concept. Using  
269 our method, the quantities of RNA obtained from field-collected single whitefly samples  
270 were sufficient for library preparation and subsequent transcriptome sequencing. Across all  
271 transcriptomes over 30M reads were obtained. The amount of transcripts were comparable  
272 to those reported in other arthropoda studies from field collections [34]. However, we did  
273 not observe any difference in assembly qualities as did [34]; probably due to the fact that  
274 our field-collected samples had degraded RNA based on RIN, and thus direct comparison  
275 with [34] was inappropriate.

276

277 Degraded insect specimen have been used successfully in previous studies [47]. This is  
278 significant, considering that a majority of insect specimen are usually collected under field  
279 conditions and stored in ethanol with different concentrations ranging from 70 to 100% [48,  
280 49] rendering the samples liable to degradation. However, to ensure good keeping of insect  
281 specimen to be used for mRNA and total RNA isolation in molecular studies and other  
282 downstream applications such as histology and immunocytochemistry, it is advisable to  
283 collect the samples in an RNA stabilizing solution such as RNAlater. The solution stabilizes

284 and protects cellular RNA in intact, unfrozen tissue and cell samples without jeopardizing  
285 the quality or quantity of RNA obtained after subsequent RNA isolation. The success of the  
286 method provided an opportunity to unmask vector-microbiota-viral dynamics in individual  
287 whiteflies in our study, and will be useful for similar studies on other small organisms.

288

### 289 **Endosymbionts diversity across individual SSA1 *B. tabaci* transcriptomes**

290 In this study, we identified bacterial endosymbionts (Table 2) that were comparable to  
291 those previously reported in SSA1 *B. tabaci* on cassava [50, 23, 37]. Secondary  
292 endosymbionts have been implicated with different roles within *B. tabaci*. *Rickettsia* has  
293 been adversely reported across putative *B. tabaci* species, including the Eastern African  
294 region [51, 23, 51]. This endosymbiont has been associated with influencing thermo  
295 tolerance in *B. tabaci* species [52]. *Rickettsia* has also been associated with altering the  
296 reproductive system of *B. tabaci*, and within the females. This has been attributed to  
297 increasing fecundity, greater survival, host reproduction manipulation and the production of  
298 a higher proportion of daughters all of which increase the impact of virus [53].  
299 *Arsenophonus*, *Wolbachia* *Arsenophonus* and *Cardinium* spp have been detected within  
300 MED and MEAM1 *Bemisia* species [12, 52]. In addition, [51] and [23] reported *Arsenophonus*  
301 within SSA1 *B. tabaci* in Eastern Africa that were collected on cassava. These endosymbionts  
302 have been associated with several deleterious functions within *B. tabaci* that include  
303 manipulating female-male host ratio through feminizing genetic males, coupled with male  
304 killing [54, 55].

305

306 Within the context of SSA agricultural systems, the role of endosymbionts in influencing *B.*  
307 *tabaci* viral transmission is important. Losses attributed to *B. tabaci* transmitted viruses

308 within different crops are estimated to be in billions of US dollars [48]. Bacterial  
309 endosymbionts have been associated with influencing viral acquisition, transmission and  
310 retention, such as in *Tomato leaf curl virus* [56, 24]. Thus, better understanding of the  
311 diversity of the endosymbionts provides additional evidence on which members of *B. tabaci*  
312 species complex more proficiently transmit viruses and thus the need for concerted efforts  
313 towards the whitefly eradication.

314

### 315 **Conclusions**

316 Our study provides a proof of concept that single whitefly RNA extraction and transcriptome  
317 sequencing is possible and the method is optimised and applicable to a range of small insect  
318 transcriptome studies. It is particularly useful in studies that wish to explore vector-  
319 microbiota-viral dynamics at individual insect level rather than pooling of insects. It is useful  
320 where genetic material is both limited as well of low quality, which is applicable to most  
321 agriculture field collections. In addition, the single whitefly transcriptome technique  
322 described in this study offers new opportunities to understand the biology and relative  
323 economic importance of the several whitefly species occurring in ecosystems within which  
324 food is produced in Sub-Saharan Africa, and will enable the efficient development and  
325 deployment of sustainable pest and disease management strategies to ensure food security  
326 in the developing countries.

327

328

## 329 **Materials and methods**

330

### 331 ***Whitefly sample collection and study design***

332 In this study, we sampled whiteflies in Uganda and Tanzania from cassava (*Manihot*  
333 *esculenta*) fields. In Uganda, fresh adult whiteflies were collected from cassava fields at the  
334 National Crops Resources Research Institute (NaCRRI), Namulonge, Wakiso district, which  
335 located in central Uganda at 32°36'E and 0°31'N, and 1134 meters above sea level. On the  
336 other hand, the whiteflies obtained from Tanzania were collected on cassava in a  
337 countrywide survey conducted in 2013. The samples: WF2 (Uganda) and WF1, WF2a, and  
338 WF2b (Tanzania) used in this study were collected on CBSD-symptomatic cassava plants. In  
339 all the cases, the whitefly samples were kept in 70% ethanol in Eppendorf tubes until  
340 laboratory analysis. The whitefly samples were used for a two-fold function; firstly, to  
341 optimise a single whitefly RNA extraction protocol and secondly, to unmask RNA viruses and  
342 endosymbionts within *B. tabaci* as a proof of concept. In addition, data obtained from  
343 Nextera – DNA library prep from a Brazilian sample (156\_NW2) was also used in this study.  
344 The whitefly was collected from a New World 2 colony in Brazil on *Euphorbia heterophylla*  
345 and kept in 70% ethanol in Eppendorf tubes until laboratory analysis.

346

### 347 ***Extraction of total RNA from single whitefly***

348 RNA extraction was carried out using the ARCTURUS® PicoPure® kit (Arcturus, CA, USA).  
349 Briefly, 30 µl of extraction buffer was added to an RNase-free micro centrifuge tube  
350 containing a single whitefly and ground using a sterile plastic pestle. To the cell extract an  
351 equal volume of 70% ethanol was added. To bind the RNA onto the column, the RNA

352 purification columns were spun for two minutes at 100 x *g* and immediately followed by  
353 centrifugation at 16,000 x *g* for 30 seconds. The purification columns were then subjected to  
354 two washing steps using wash buffer 1 and 2 (ethyl alcohol). The purification column was  
355 transferred to a fresh RNase-free 0.5 ml micro centrifuge tube, with 30 ul of RNase-free  
356 water added to elute the RNA. The column was incubated at room temperature for five  
357 minutes, and subsequently spun for one minute at 1,000 x *g*, followed by 16,000 x *g* for one  
358 minute. The eluted RNA was returned into the column and re-extracted to increase the  
359 concentration. Extracted RNA was treated with DNase using the TURBO DNA free kit as  
360 described by the manufacturer (Ambion, life Technologies, CA USA). Concentration of RNA  
361 was done in a vacuum centrifuge (Eppendorf, Germany) at room temperature for 1 hour,  
362 the pellet was suspended in 15 ul of RNase-free water and stored at -80 °C awaiting analysis.  
363 RNA was quantified, and the quality and integrity assessed using the 2100 Bioanalyzer  
364 (Agilent Technologies). Dilutions of up to x10 were made for each sample prior to analysis in  
365 the bioanalyzer.

366

### 367 ***cDNA and illumina library preparation***

368 Total RNA from each individual whitefly sample was used for cDNA library preparation using  
369 the Illumina TruSeq Stranded Total RNA Preparation kit as described by the manufacturer  
370 (Illumina, San Diego, CA, USA). Subsequently, sequencing was carried out using the  
371 HiSeq2000 on the rapid run mode generating 2 x 50 bp paired-end reads. Base calling,  
372 quality assessment and image analysis were conducted using the HiSeq control software  
373 v1.4.8 and Real Time Analysis v1.18.61 at the Australian Genome Research Facility (Perth,  
374 Australia).

375



376 **Analysis of NGS data using the supercomputer**

377 **Assembly of RNA transcripts:** Raw RNA-Seq reads were trimmed using Trimmomatic. The  
378 trimmed reads were used for *de novo* assembly using Trinity [57] with the following  
379 parameters: time -p srun --export=all -n 1 -c \${NUM\_THREADS} Trinity --seqType fq --  
380 max\_memory 30G --left 2\_1.fastq --right 2\_2.fastq --SS\_lib\_type RF --CPU  
381 \${NUM\_THREADS} --trimmomatic --cleanup --min\_contig\_length 1000 -output \_trinity  
382 min\_glue = 1, V = 10, edge-thr = 0.05, min\_kmer\_cov = 2, path\_reinforcement\_distance =  
383 150, and group pairs distance = 500.

384

385 **BLAST analysis of transcripts and annotation:** BLAST searches of the transcripts under study  
386 were carried out on the NCBI (<http://www.ncbi.nlm.nih.gov>) non-redundant nucleotide  
387 database using the default cut-off on the Magnus Supercomputer at the Pawsey  
388 Supercomputer Centre Western Australia. Transcripts identical to known bacterial  
389 endosymbionts were identified and the number of genes from each identified  
390 endosymbiont bacteria determined.

391

392 **Phylogenetic analysis of whitefly mitochondrial cytochrome oxidase I (COI):** The  
393 phylogenetic relationship of mitochondrial cytochrome oxidase I (mtCOI) of the whitefly  
394 samples in this study were inferred using a Bayesian phylogenetic method implemented in  
395 MrBayes 3.2.2 [58] . The optimal substitution model was selected using Akaike Information  
396 Criteria (AIC) implemented in the jmodel test 2 [60].

397

398 **Sequence alignment and phylogenetic analysis of NusG gene in *P. aleyrodidarum* across *B.***  
399 ***tabaci* species:** Sequence alignment of the *NusG* gene from the P-endosymbiont *P.*

400 *aleyrodidarum* from the SSA1 *B. tabaci* in this study was compared with another *B. tabaci*  
401 species, *Trialeurodes vaporariorum* and *Alerodicus dispersus* using MAFFT v7.017 [61]. The  
402 Jmodel version 2 [60] was used to search for phylogenetic models with the Akaike  
403 information criterion selecting the optimal that was to be implemented in MrBayes 3.2.2.  
404 MrBayes run was carried out using the command: “lset nst=6 rates=gamma” for 50 million  
405 generations, with trees sampled every 1000 generations. In each of the runs, the first 25%  
406 (2,500) trees were discarded as burn in.

407

#### 408 ***Analysis and modelling the structure of the NusG gene***

409 The structures for *Portiera aleyrodidarum* BT and *B. tabaci* SSA1 whitefly were predicted  
410 using Phyre2 [62] with 100% confidence and compared to known structures of NusG from  
411 other bacterial species. All models were prepared using Pymol (The PyMOL Molecular  
412 Graphics System, Version 1.5.0.4).

413

414

415

416

417

418 **Table legends**

419

420 **Table 1** Summary statistics from De novo trinity assemble of Illumina paired end individual

421 whitefly transcriptome

422

423 **Table 2** Distribution of endosymbionts and number of genes present in endosymbionts

424 bacteria

425

426 **Figure legends**

427

428 **Fig. 1** Sequence alignment of nucleotide sequences of *NusG* gene in *P. aleyrodidarum* across

429 whitefly species sequences using MAFFT v 7.017

430

431 **Fig. 2** Bayesian phylogenetic tree of *NusG* gene of *P. aleyrodidarum* across whitefly species

432 using MrBayes -3.2.2

433

434 **Fig. 3** Structure of the *NusG* gene showing the 11 amino acid deletion in a transcription

435 factor of the primary endosymbiont *Portiera aleyrodidarum* of the SSA1 *B. tabaci* species

436

437 **Fig. 4** Structure analysis of *NusG* from *P. aleyrodidarum* in *B. tabaci* and other

438 endosymbionts **A.** Phyre2 based structure prediction of *NusG* from *Candidatus Portiera*

439 *aleyrodidarum* in *B. tabaci* SSAI whitefly and comparisons to the structures of *NusG* from

440 other bacterial species as indicated and of Spt4/5 from yeast. *NusG* is coloured in grey, the

441 loop region in magenta and the 11-residue deletion is shown in green in the *C. Portiera*

442 *aleyrodidarum* structure. **B.** A model of bacterial RNA polymerase (orange surface  
443 representation) bound to the N-terminal domain of the *T. thermophiles* NusG (grey cartoon  
444 representation)

## 445   **References**

- 446   [1]   P. J. De Barro, S.-S. Liu, L. M. Boykin, and A. B. Dinsdale, “Bemisia tabaci: a statement  
447       of species status.,” *Annu. Rev. Entomol.*, vol. 56, pp. 1–19, 2011.
- 448   [2]   J. E. Polston and H. Capobianco, “Transmitting plant viruses using whiteflies.,” *J. Vis.*  
449       *Exp.*, no. 81, p. e4332, 2013.
- 450   [3]   D. R. Jones “Plant viruses transmitted by white ies,” *Eur. J. Plant Pathol.*, vol. 109, pp.  
451       195–219, 2003.
- 452   [4]   V. Vassiliou, M. Emmanouilidou, A. Perrakis, E. Morou, J. Vontas, A. Tsagkarakou, and  
453       E. Roditakis, “Insecticide resistance in Bemisia tabaci from Cyprus,” *Insect Sci.*, vol. 18,  
454       no. 1, pp. 30–39, 2011.
- 455   [5]   FAO, *Save and Grow: Cassava. A Guide to Sustainable Production Intensification*.  
456       2013.
- 457   [6]   B. L. Patil and C. M. Fauquet, “Cassava mosaic geminiviruses : actual knowledge and  
458       perspectives,” vol. 10, pp. 685–701, 2009.
- 459   [7]   J. P. Legg, B. Owor, P. Sseruwagi, and J. Ndunguru, “Cassava Mosaic Virus Disease in  
460       East and Central Africa: Epidemiology and Management of A Regional Pandemic,”  
461       *Adv. Virus Res.*, vol. 67, no. 6, pp. 355–418, 2006.
- 462   [8]   M. N. Maruthi, R. J. Hillocks, K. Mtunda, M. D. Raya, M. Muhanna, H. Kiozia, A. R.  
463       Rekha, J. Colvin, and J. M. Thresh, “Transmission of Cassava brown streak virus by  
464       Bemisia tabaci (Gennadius),” *J. Phytopathol.*, vol. 153, no. 5, pp. 307–312, 2005.
- 465   [9]   B. Mware, R. Narla, R. Amata, F. Olubayo, J. Songa, S. Kyamanyua, and E. M. Ateka,  
466       “Efficiency of cassava brown streak virus transmission by two whitefly species in  
467       coastal Kenya,” *J. Gen. Mol. Virol.*, vol. 1, no. 4, pp. 40–45, 2009.
- 468   [10]  J. Ndunguru, P. Sseruwagi, F. Tairo, F. Stomeo, S. Maina, A. Djinkeng, M. Kehoe, L. M.

- 469 Boykin, and U. Melcher, “Analyses of twelve new whole genome sequences of  
470 cassava brown streak viruses and ugandan cassava brown streak viruses from East  
471 Africa: Diversity, supercomputing and evidence for further speciation,” *PLoS One*, vol.  
472 10, no. 10, pp. 1–18, 2015.
- 473 [11] T. Alicai, J. Ndunguru, P. Sseruwagi, F. Tairo, G. Okao-Okuja, R. Nanvubya, L. Kiiza, L.  
474 Kubatko, M. A. Kehoe, L. M. Boykin, , “Cassava brown streak virus has a rapidly  
475 evolving genome: implications for virus speciation, variability, diagnosis and host  
476 resistance,” *Sci. Rep.*, vol. 6, no. June, p. 36164, 2016.
- 477 [12] G. Gueguen, F. Vavre, O. Gnankine, M. Peterschmitt, D. Charif, E. Chiel, Y. Gottlieb, M.  
478 Ghanim, E. Zchori-Fein, and F. Fleury, “Endosymbiont metacommunities, mtDNA  
479 diversity and the evolution of the Bemisia tabaci (Hemiptera: Aleyrodidae) species  
480 complex,” *Mol. Ecol.*, vol. 19, no. 19, pp. 4365–4378, 2010.
- 481 [13] G. Gueguen, F. Vavre, O. Gnankine, M. Peterschmitt, D. Charif, E. Chiel, Y. Gottlieb, M.  
482 Ghanim, E. Zchori-Fein, and F. Fleury, “Endosymbiont metacommunities, mtDNA  
483 diversity and the evolution of the Bemisia tabaci (Hemiptera: Aleyrodidae) species  
484 complex,” *Mol. Ecol.*, vol. 19, pp. 4365–4378, 2010.
- 485 [14] X. L. Bing, Y. M. Ruan, Q. Rao, X. W. Wang, and S. S. Liu, “Diversity of secondary  
486 endosymbionts among different putative species of the whitefly Bemisia tabaci,”  
487 *Insect Sci.*, vol. 20, no. 2, pp. 194–206, 2013.
- 488 [15] J. M. Marubayashi, V. a. Yuki, K. C. G. Rocha, T. Mituti, F. M. Pelegrinotti, F. Z.  
489 Ferreira, M. F. Moura, J. Navas-Castillo, E. Moriones, M. a. Pavan, and R. Krause-  
490 Sakate, “At least two indigenous species of the Bemisia tabaci complex are present in  
491 Brazil,” *J. Appl. Entomol.*, vol. 137, pp. 113–121, 2013.
- 492 [16] M. L. Thao and P. Baumann, “Evolutionary relationships of primary prokaryotic

- 493 endosymbionts of whiteflies and their hosts,” *Appl. Environ. Microbiol.*, vol. 70, no. 6,  
494 pp. 3401–3406, 2004.
- 495 [17] N. Moran, J. P. McCutcheon, and A. Nakabachi, “Genomics and evolution of heritable  
496 bacterial symbionts.,” *Annu. Rev. Genet.*, vol. 42, pp. 165–190, 2008.
- 497 [18] R. A. Mooney, K. Schweimer, P. Rösch, M. Gottesman, and R. Landick, “Two  
498 Structurally Independent Domains of E. coli NusG Create Regulatory Plasticity via  
499 Distinct Interactions with RNA Polymerase and Regulators,” *J. Mol. Biol.*, vol. 391, no.  
500 2, pp. 341–358, 2009.
- 501 [19] A. V. Yakhnin, K. S. Murakami, and P. Babitzke, “NusG is a sequence-specific RNA  
502 polymerase pause factor that binds to the non-template DNA within the paused  
503 transcription bubble,” *J. Biol. Chem.*, vol. 291, no. 10, pp. 5299–5308, 2016.
- 504 [20] E. Zchori-Fein and J. K. Brown, “Diversity of prokaryotes associated with Bemisia  
505 tabaci (Gennadius) (Homoptera : Aleyrodidae),” *Ann. Entomol. Soc. Am.*, vol. 95, no. 6,  
506 pp. 711–718, 2002.
- 507 [21] Y. Gottlieb, M. Ghanim, E. Chiel, D. Gerling, V. Portnoy, S. Steinberg, G. Tzuri, a Rami,  
508 E. Belausov, N. Mozes-daube, M. Gershon, S. Gal, N. Katzir, E. Zchori-fein, a R.  
509 Horowitz, and S. Kontsedalov, “Identification and Localization of a Rickettsia sp . in  
510 Bemisia tabaci ( Homoptera : Aleyrodidae ) Identification and Localization of a  
511 Rickettsia sp . in Bemisia tabaci ( Homoptera : Aleyrodidae ),” *Appl. Environ.*  
512 *Microbiol.*, vol. 72, no. 5, pp. 3646–3652, 2006.
- 513 [22] J. M. Marubayashi, A. Kliot, V. A. Yuki, J. A. M. Rezende, R. Krause-Sakate, M. A.  
514 Pavan, and M. Ghanim, “Diversity and Localization of Bacterial Endosymbionts from  
515 Whitefly Species Collected in Brazil,” *PLoS One*, vol. 9, no. 9, p. e108363, 2014.
- 516 [23] S. Ghosh, P. S. Mitra, C. A. Loffredo, T. Trnovec, L. Murinova, E. Sovcikova, S.

- 517 Ghimbovschi, S. Zang, E. P. Hoffman, and S. K. Dutta, “Transcriptional profiling and  
518 biological pathway analysis of human equivalence PCB exposure in vitro: Indicator of  
519 disease and disorder development in humans,” *Environ. Res.*, vol. 138, pp. 202–216,  
520 2015.
- 521 [24] A. Kliot, M. Cilia, H. Czosnek, and M. Ghanim, “Implication of the bacterial  
522 endosymbiont *Rickettsia* spp. in interactions of the whitefly *Bemisia tabaci* with  
523 tomato yellow leaf curl virus.,” *J. Virol.*, vol. 88, no. 10, pp. 5652–5660, 2014.
- 524 [25] K. Rosario, H. Capobianco, T. F. F. Ng, M. Breitbart, and J. E. Polston, “RNA viral  
525 metagenome of whiteflies leads to the discovery and characterization of a whitefly-  
526 transmitted carlavirus in North America.,” *PLoS One*, vol. 9, no. 1, p. e86748, 2014.
- 527 [26] K. Rosario, C. Marr, A. Varsani, S. Kraberger, D. Stainton, E. Moriones, J. E. Polston,  
528 and M. Breitbart, “Begomovirus-associated satellite DNA diversity captured through  
529 vector-enabled metagenomic (VEM) surveys using whiteflies (Aleyrodidae),” *Viruses*,  
530 vol. 8, no. 2, pp. 1–16, 2016.
- 531 [27] K. Rosario, Y. M. Seah, C. Marr, A. Varsani, S. Kraberger, D. Stainton, E. Moriones, J. E.  
532 Polston, S. Duffy, and M. Breitbart, “Vector-enabled metagenomic (VEM) surveys  
533 using whiteflies (Aleyrodidae) reveal novel begomovirus species in the new and old  
534 worlds,” *Viruses*, vol. 7, no. 10, pp. 5553–5570, 2015.
- 535 [28] M. F. Poelchau, B. S. Coates, C. P. Childers, A. A. Pérez De León, J. D. Evans, K. Hackett,  
536 and D. Shoemaker, “Agricultural applications of insect ecological genomics,” *Curr.*  
537 *Opin. Insect Sci.*, vol. 13, no. December 2015, pp. 61–69, 2016.
- 538 [29] D. E. Kapantaidaki, I. Ovčarenko, N. Fytrou, K. E. Knott, K. Bourtzis, and A.  
539 Tsagkarakou, “Low Levels of Mitochondrial DNA and Symbiont Diversity in the  
540 Worldwide Agricultural Pest, the Greenhouse Whitefly *Trialeurodes vaporariorum*



- 541 (Hemiptera: Aleyrodidae).,” *J. Hered.*, pp. 1–13, 2014.
- 542 [30] S. Morin, M. Ghanim, I. Sobol, and H. Czosnek, “The GroEL protein of the whitefly  
543 *Bemisia tabaci* interacts with the coat protein of transmissible and nontransmissible  
544 begomoviruses in the yeast two-hybrid system.,” *Virology*, vol. 276, pp. 404–416,  
545 2000.
- 546 [31] J. Xue, X. Zhou, C.-X. Zhang, L.-L. Yu, H.-W. Fan, Z. Wang, H.-J. Xu, Y. Xi, Z.-R. Zhu, W.-  
547 W. Zhou, P.-L. Pan, B.-L. Li, J. K. Colbourne, H. Noda, Y. Suetsugu, T. Kobayashi, Y.  
548 Zheng, S. Liu, R. Zhang, Y. Liu, Y.-D. Luo, D.-M. Fang, Y. Chen, D.-L. Zhan, X.-D. Lv, Y.  
549 Cai, Z.-B. Wang, H.-J. Huang, R.-L. Cheng, X.-C. Zhang, Y.-H. Lou, B. Yu, J.-C. Zhuo, Y.-X.  
550 Ye, W.-Q. Zhang, Z.-C. Shen, H.-M. Yang, J. Wang, J. Wang, Y.-Y. Bao, and J.-A. Cheng,  
551 “Genomes of the rice pest brown planthopper and its endosymbionts reveal complex  
552 complementary contributions for host adaptation.,” *Genome Biol.*, vol. 15, no. 12, p.  
553 521, 2014.
- 554 [32] J. K. Kim, Y. J. Won, N. Nikoh, H. Nakayama, S. H. Han, Y. Kikuchi, Y. H. Rhee, H. Y.  
555 Park, J. Y. Kwon, K. Kurokawa, N. Dohmae, T. Fukatsu, and B. L. Lee, “Polyester  
556 synthesis genes associated with stress resistance are involved in an insect-bacterium  
557 symbiosis.,” *Proc. Natl. Acad. Sci. U. S. A.*, vol. 110, no. 26, pp. E2381-9, 2013.
- 558 [33] X.-W. Wang, Q.-Y. Zhao, J.-B. Luan, Y.-J. Wang, G.-H. Yan, and S.-S. Liu, “Analysis of a  
559 native whitefly transcriptome and its sequence divergence with two invasive whitefly  
560 species,” *BMC Genomics*, vol. 13, no. 1, p. 529, 2012.
- 561 [34] N. Kono, H. Nakamura, and K. Arakawa, “Evaluation of the impact of RNA  
562 preservation methods of spiders for de novo transcriptome assembly,” pp. 662–672,  
563 2016.
- 564 [35] D. Charlesworth and J. H. Willis, “The genetics of inbreeding depression.”

- 565 [36] X. L. Bing, W. Q. Xia, J. D. Gui, G. H. Yan, X. W. Wang, and S. S. Liu, "Diversity and  
566 evolution of the Wolbachia endosymbionts of Bemisia (Hemiptera: Aleyrodidae)  
567 whiteflies," *Ecol. Evol.*, vol. 4, pp. 2714–2737, 2014.
- 568 [37] Q. Rao, P.-A. Rollat-Farnier, D.-T. Zhu, D. Santos-Garcia, F. J. Silva, A. Moya, A. Latorre,  
569 C. C. Klein, F. Vavre, M.-F. Sagot, S.-S. Liu, L. Mouton, and X.-W. Wang, "Genome  
570 reduction and potential metabolic complementation of the dual endosymbionts in  
571 the whitefly Bemisia tabaci," *BMC Genomics*, vol. 16, no. 1, p. 226, 2015.
- 572 [38] L. M. Boykin, R. G. Shatters, R. C. Rosell, C. L. McKenzie, R. A. Bagnall, P. De Barro, and  
573 D. R. Frohlich, "Global relationships of Bemisia tabaci (Hemiptera: Aleyrodidae)  
574 revealed using Bayesian analysis of mitochondrial COI DNA sequences," *Mol.*  
575 *Phylogenet. Evol.*, vol. 44, pp. 1306–1319, 2007.
- 576 [39] C.-H. Hsieh, C.-C. Ko, C.-H. Chung, and H.-Y. Wang, "Multilocus approach to clarify  
577 species status and the divergence history of the Bemisia tabaci (Hemiptera:  
578 Aleyrodidae) species complex," *Mol. Phylogenet. Evol.*, vol. 76, pp. 172–180, 2014.
- 579 [40] P. Reay, K. Yamasaki, T. Terada, S. Kuramitsu, M. Shirouzu, and S. Yokoyama,  
580 "Structural and sequence comparisons arising from the solution structure of the  
581 transcription elongation factor NusG from Thermus thermophilus," *Proteins Struct.*  
582 *Funct. Genet.*, vol. 56, no. 1, pp. 40–51, 2004.
- 583 [41] T. Steiner, J. T. Kaiser, S. Marinković, R. Huber, and M. C. Wahl, "Crystal structures of  
584 transcription factor NusG in light of its nucleic acid- and protein-binding activities,"  
585 *EMBO J.*, vol. 21, no. 17, pp. 4641–4653, 2002.
- 586 [42] J. Li, R. Horwitz, S. McCracken, and J. Greenblatt, "NusG, a new Escherichia coli  
587 elongation factor involved in transcriptional antitermination by the N protein of  
588 phage ??," *J. Biol. Chem.*, vol. 267, no. 9, pp. 6012–6019, 1992.

- 589 [43] D. G. Vassilyev, M. N. Vassilyeva, A. Perederina, T. H. Tahirov, and I. Artsimovitch,  
590 “Structural basis for transcription elongation by bacterial RNA polymerase.,” *Nature*,  
591 vol. 448, no. 7150, pp. 157–162, 2007.
- 592 [44] W. Xie, Q. shu Meng, Q. jun Wu, S. li Wang, X. Yang, N. na Yang, R. mei Li, X. guo Jiao,  
593 H. peng Pan, B. ming Liu, Q. Su, B. yun Xu, S. nian Hu, X. guo Zhou, and Y. jun Zhang,  
594 “Pyrosequencing the Bemisia tabaci transcriptome reveals a highly diverse bacterial  
595 community and a robust system for insecticide resistance,” *PLoS One*, vol. 7, no. 4,  
596 pp. 1–13, 2012.
- 597 [45] R. Kajitani, K. Toshimoto, H. Noguchi, A. Toyoda, Y. Ogura, M. Okuno, M. Yabana, M.  
598 Harada, E. Nagayasu, H. Maruyama, Y. Kohara, A. Fujiyama, T. Hayashi, and T. Itoh,  
599 “Efficient de novo assembly of highly heterozygous genomes from whole-genome  
600 shotgun short reads,” *Genome Res.*, vol. 24, no. 8, pp. 1384–1395, 2014.
- 601 [46] R. L. S. J. and J. K. B. Dena Leshkowitz, Shirley Gazit, Eli Reuveni, Murad Ghanim,  
602 Henryk Czosnek, CindyMcKenzie, “Whitefly (*Bemisia tabaci*) genome project: analysis  
603 of sequenced clones from egg, instar, and adult (viruliferous and non-viruliferous)  
604 cDNA libraries.,” *BMC Genomics*, vol. 7, p. 79, 2015.
- 605 [47] I. Gallego Romero, A. A. Pai, J. Tung, and Y. Gilad, “RNA-seq: impact of RNA  
606 degradation on transcript quantification.,” *BMC Biol.*, vol. 12, no. 1, p. 42, 2014.
- 607 [48] J. P. Legg, P. Sseruwagi, S. Boniface, G. Okao-Okuja, R. Shirima, S. Bigirimana, G.  
608 Gashaka, H. W. Herrmann, S. Jeremiah, H. Obiero, I. Ndyetabula, W. Tata-Hangy, C.  
609 Masembe, and J. K. Brown, “Spatio-temporal patterns of genetic change amongst  
610 populations of cassava *Bemisia tabaci* whiteflies driving virus pandemics in East and  
611 Central Africa,” *Virus Res.*, vol. 186, pp. 61–75, 2014.
- 612 [49] 7 and L. M. Boykin1 J. M. Wainaina, P. De Barro, L. Kubatko, M. A. Kehoe, J. Harvey, D.

- 613 Karanja, “Genetic Diversity , Population Structure and Species Delimitation of  
614 *Trialeurodes vaporariorum* ( greenhouse whitefly ),” 2016.
- 615 [50] L. S. Tajebe, D. Guastella, V. Cavalieri, S. E. Kelly, M. S. Hunter, O. S. Lund, J. P. Legg,  
616 and C. Rapisarda, “Diversity of symbiotic bacteria associated with *Bemisia tabaci* (  
617 Homoptera : Aleyrodidae ) in cassava mosaic disease pandemic areas of Tanzania,”  
618 2014.
- 619 [51] L. S. Tajebe, D. Guastella, V. Cavalieri, S. E. Kelly, M. S. Hunter, O. S. Lund, J. P. Legg,  
620 and C. Rapisarda, “Diversity of symbiotic bacteria associated with *Bemisia tabaci*  
621 (*Homoptera*: *Aleyrodidae*) in cassava mosaic disease pandemic areas of Tanzania,”  
622 *Ann. Appl. Biol.*, vol. 166, no. 2, pp. 297–310, 2015.
- 623 [52] M. Brumin, S. Kontsedalov, and M. Ghanim, “*Rickettsia* influences thermotolerance in  
624 the whitefly *Bemisia tabaci* B biotype,” *Insect Sci.*, vol. 18, no. 1, pp. 57–66, 2011.
- 625 [53] A. G. Himler, T. Adachi-Hagimori, J. E. Bergen, A. Kozuch, S. E. Kelly, B. E. Tabashnik, E.  
626 Chiel, V. E. Duckworth, T. J. Dennehy, E. Zchori-Fein, and M. S. Hunter, “Rapid spread  
627 of a bacterial symbiont in an invasive whitefly is driven by fitness benefits and female  
628 bias.,” *Science*, vol. 332, no. 6026, pp. 254–256, 2011.
- 629 [54] O. Duron, D. Bouchon, S. S. S. Boutin, L. Bellamy, L. Zhou, J. Engelstadter, G. D. Hurst,  
630 J. Engelstädter, and G. D. Hurst, “The diversity of reproductive parasites among  
631 arthropods: *Wolbachia* do not walk alone,” *BMC Biol.*, vol. 6, p. 27, 2008.
- 632 [55] J. Engelstädter and G. D. D. D. Hurst, “The ecology and evolution of microbes that  
633 manipulate host reproduction,” *Annu. Rev. Ecol. Evol. Syst.*, vol. 40, no. 1, pp. 127–  
634 149, 2009.
- 635 [56] Q. Su, H. Pan, B. Liu, D. Chu, W. Xie, Q. Wu, S. Wang, B. Xu, and Y. Zhang, “Insect  
636 symbiont facilitates vector acquisition, retention, and transmission of plant virus.,”

- 637 *Sci. Rep.*, vol. 3, p. 1367, 2013.
- 638 [57] M. G. Grabherr, B. J. Haas, M. Yassour, J. Z. Levin, D. A. Thompson, I. Amit, X.  
639 Adiconis, L. Fan, R. Raychowdhury, Q. Zeng, Z. Chen, E. Mauceli, N. Hacohen, A.  
640 Gnirke, N. Rhind, F. di Palma, B. W. Birren, C. Nusbaum, K. Lindblad-Toh, N. Friedman,  
641 and A. Regev, “Full-length transcriptome assembly from RNA-Seq data without a  
642 reference genome,” *Nat. Biotechnol.*, vol. 29, no. 7, pp. 644–52, 2011.
- 643 [58] J. P. Huelsenbeck, P. Andolfatto, and E. T. Huelsenbeck, “Structurama: Bayesian  
644 inference of population structure,” *Evol. Bioinforma.*, vol. 2011, no. 7, pp. 55–59,  
645 2011.
- 646 [59] J. P. and R. F. Huelsenbeck, “MrBAYES : Bayesian inference of phylogenetic trees,”  
647 *Interface*, vol. 17, no. 8, pp. 754–755, 2001.
- 648 [60] D. Darriba, G. L. Taboada, R. Doallo, and D. Posada, “jModelTest 2: more models, new  
649 heuristics and parallel computing,” *Nat. Methods*, vol. 9, no. 8, pp. 772–772, 2012.
- 650 [61] K. Katoh, K. Misawa, K. Kuma, and T. Miyata, “MAFFT: a novel method for rapid  
651 multiple sequence alignment based on fast Fourier transform.,” *Nucleic Acids Res.*,  
652 vol. 30, no. 14, pp. 3059–3066, 2002.
- 653 [62] L. A. Kelly, S. Mezulis, C. Yates, M. Wass, and M. Sternberg, “The Phyre2 web portal  
654 for protein modelling, prediction, and analysis,” *Nat. Protoc.*, vol. 10, no. 6, pp. 845–  
655 858, 2015.
- 656

657

658 **Declarations**

659

660 **Acknowledgements**

661 J.M.W is supported by an Australian Award scholarship by the Department of Foreign Affairs  
662 and Trade (DFAT).

663

664 **Availabiliy of data**

665 All raw reads for the four whitefly have been deposited in NCBI SRA under the accession  
666 SRR5110306, SRR5110307, SRR5109958

667

668 **Consent for publication**

669 Not applicable

670

671 **Competing interests**

672 The authors declare that they have no conflict of interest.

673

674 **Funding**

675 This work was supported by Mikocheni Agricultural Research Institute (MARI), Tanzania  
676 through the “Disease Diagnostics for Sustainable Cassava Productivity in Africa” project,  
677 Grant no. OPP1052391 that is jointly funded by the Bill and Melinda Gates Foundation and  
678 The Department for International Development (DFID). The Pawsey Supercomputing Centre  
679 provided computational resources with funding from the Australian Government and the  
680 Government of Western Australia supported this work.

681

682 **Authors Contribution**

683 LB, PS, JN, JMW ST designed the research the experiment. JMW, JG performed RNA-seq  
684 analysis. RT, FR, BD, TK, MK provided samples and laboratory experiments. AV, AB did the  
685 NusG modelling. JMW, PS, LB wrote the manuscript. All authors read and approved the final  
686 manuscript.

**Table 1** Summary statistics from De novo Trinity assemble of Illumina paired end individual whitefly transcriptome

|                                            | <b>WF1</b>             | <b>WF2</b>             | <b>WF2a</b>            | <b>WF2b</b>            |
|--------------------------------------------|------------------------|------------------------|------------------------|------------------------|
| Total Number of reads                      | 39,343,141             | 42,587,057             | 42,513,188             | 42,928,131             |
| Number of reads after trimming for quality | 34,470,311<br>(87.61%) | 39,898,821<br>(93.69%) | 40,121,377<br>(94.37%) | 40,781,932<br>(95.00%) |
| Transcripts                                | 65,550                 | 73,107                 | 162,487                | 104,539                |
| All transcript Contigs (N50)               | 505                    | 525                    | 1,084                  | 1,018                  |
| Only longest contigs (N50)                 | 468                    | 484                    | 707                    | 746                    |



**Table 2** Distribution of endosymbionts and number of genes present within each endosymbiont bacteria present in four SSA1 *B. tabaci* samples from this study

| <b>Endosymbionts</b>                                                     | <b>WF2</b> | <b>WF2a</b> | <b>WF2b</b> | <b>WF1</b> |
|--------------------------------------------------------------------------|------------|-------------|-------------|------------|
| Candidatus Portiera aleyrodidarum                                        | 322        | 302         | 408         | 312        |
| Arsenophonus                                                             | 3          | 1           | 1           | 1          |
| Arsenophonus endosymbiont of Bemisia tabaci                              | 1          | 2           | 1           | 2          |
| Arsenophonus endosymbiont of Nilaparvata lugens                          | 55         | 22          | 73          | 47         |
| Arsenophonus nasoniae                                                    | 33         | 13          | 34          | 12         |
| Wolbachia endosymbiont of Cadra cautella                                 | 3          | 6           | 6           | 3          |
| Wolbachia endosymbiont of Caudra cautella                                | NA         | NA          | NA          | 3          |
| Wolbachia endosymbiont of Cimex lectularius                              | NA         | 5           | 2           | NA         |
| Wolbachia endosymbiont of Culex quinquefasciatus                         | 2          | 9           | 3           | 2          |
| Wolbachia endosymbiont of Diaphorina citri                               | 3          | NA          | 1           | 4          |
| Wolbachia endosymbiont of Drosophila ananassae                           | 6          | 14          | 15          | 6          |
| Wolbachia endosymbiont of Drosophila simulans                            | 1          | 6           | 5           | 3          |
| Wolbachia endosymbiont of Operophtera brumata                            | NA         | 2           | NA          | 2          |
| Wolbachia endosymbiont of Muscidifurax uniraptor                         | 1          | NA          | NA          | NA         |
| Wolbachia endosymbiont wVitA of Nasonia vitripennis phage                | 1          | 6           | 3           | NA         |
| WOVitA1/Wolbachia endosymbiont wVitB of Nasonia vitripennis phage WOVitB |            |             |             |            |
| Wolbachia pipientis                                                      | 5          | 9           | 4           | 4          |
| Wolbachia pipientis wAlbB                                                | 5          | 4           | 2           | NA         |
| Wolbachia sp. wRi                                                        | 3          | 13          | 8           | 5          |
| Rickettsia africae                                                       | NA         | 2           | 1           | NA         |
| Rickettsia argasii T170-B                                                | NA         | 4           | 7           | NA         |

|                                                 |    |    |    |    |
|-------------------------------------------------|----|----|----|----|
| Rickettsia australis                            | NA | 1  | 2  | NA |
| Rickettsia buchneri                             | NA | NA | 10 | NA |
| Rickettsia Canadensis                           | NA | 5  | NA | NA |
| Rickettsia Helvetica                            | 3  | 2  | 3  | 5  |
| Rickettsia hoogstraalii                         | NA | NA | 2  | NA |
| Rickettsia japonica                             | NA | 1  | NA | NA |
| Rickettsia massiliae MTU5                       | NA | 1  | 3  | NA |
| Rickettsia monacensis                           | NA | NA | 5  | NA |
| Rickettsia prowazekii                           | NA | NA | 4  | NA |
| Rickettsia tamurae                              | NA | NA | 1  | NA |
| Rickettsia endosymbiont of Ixodes scapularis    | 1  | 20 | 9  | 1  |
| Candidatus Rickettsia asemboensis               | NA | NA | NA | 1  |
| Candidatus Rickettsia gravesii                  | NA | 1  | 1  | NA |
| Candidatus Rickettsia amblyommii str. Ac/Pa     | NA | 1  | NA | NA |
| Candidatus Rickettsia amblyommii                | NA | 1  | NA | NA |
| Candidatus Rickettsia amblyommii str. GAT-30V   | NA | 1  | NA | NA |
| Rickettsiaceae bacterium Os18                   | NA | 43 | 34 | 2  |
| Rickettsiales bacterium Ac37b                   | 1  | 4  | 4  | NA |
| Rickettsia peacockii str. Rustic                | NA | 26 | 13 | NA |
| Rickettsia bellii                               | 1  | 10 | 10 | 1  |
| Rickettsia felis str. Pedreira                  | NA | 4  | 4  | 1  |
| Rickettsia felis str. LSU                       | NA | 5  | 8  | NA |
| Rickettsia prowazekii str. GvF12                | 2  | 2  | 4  | NA |
| Cardinium endosymbiont of Bemisia tabaci        | NA | 4  | 3  | NA |
| Cardinium endosymbiont of Encarsia pergandiella | NA | 5  | 3  | NA |
| Candidatus Hamiltonella defensa                 | NA | 1  | NA | NA |

---

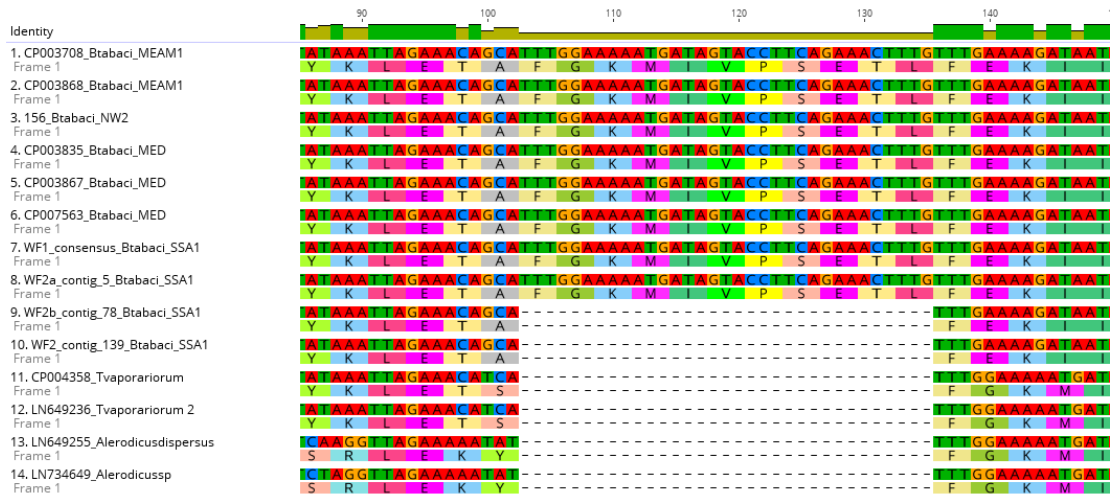

**Fig. 1** Sequence alignment of nucleotide sequences of *NusG* gene in *P. aleyrodidarum* across whitefly species sequences using MAFFT v 7.017

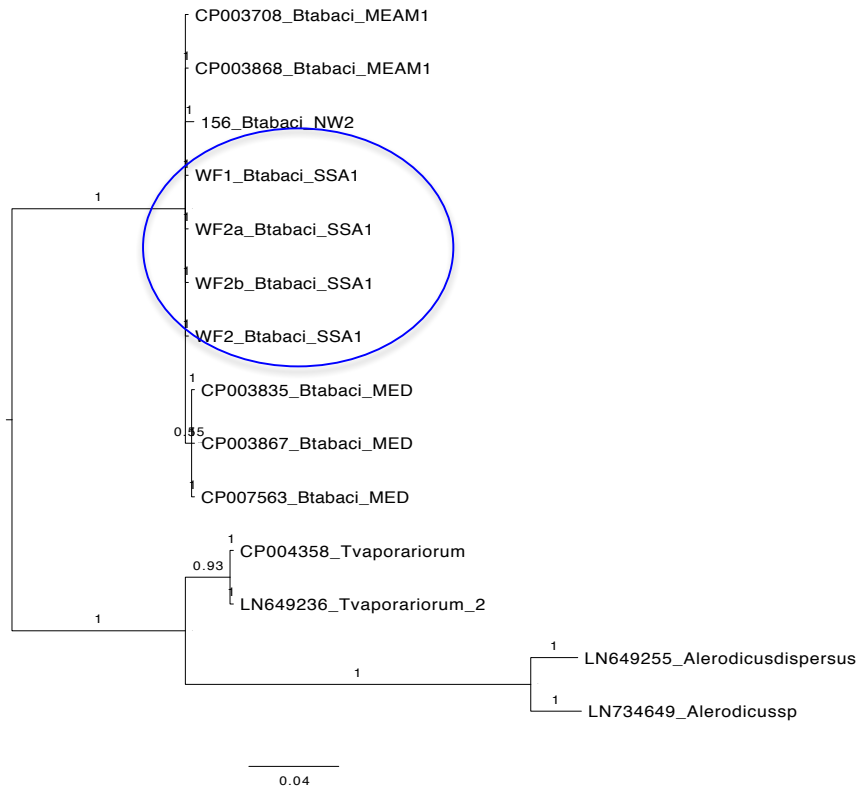

**Fig. 2** Bayesian phylogenetic tree of *NusG* gene of *P. aleyrodidarum* across whitefly species using MrBayes -3.2.2. Circled are *B. tabaci* samples from this study

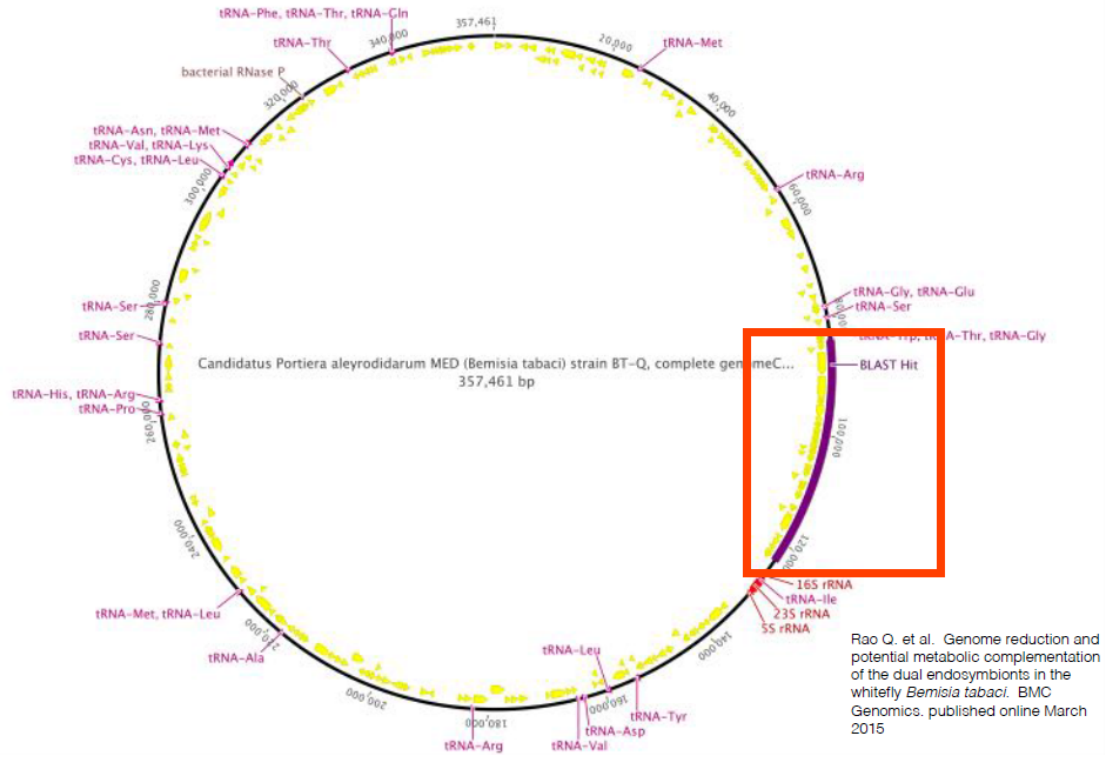

**Fig. 3** Structure of the *NusG* gene showing the 11 amino acid deletion in a transcription factor of the primary endosymbiont *Portiera aleyrodidarum* of the SSA1 *B. tabaci* species

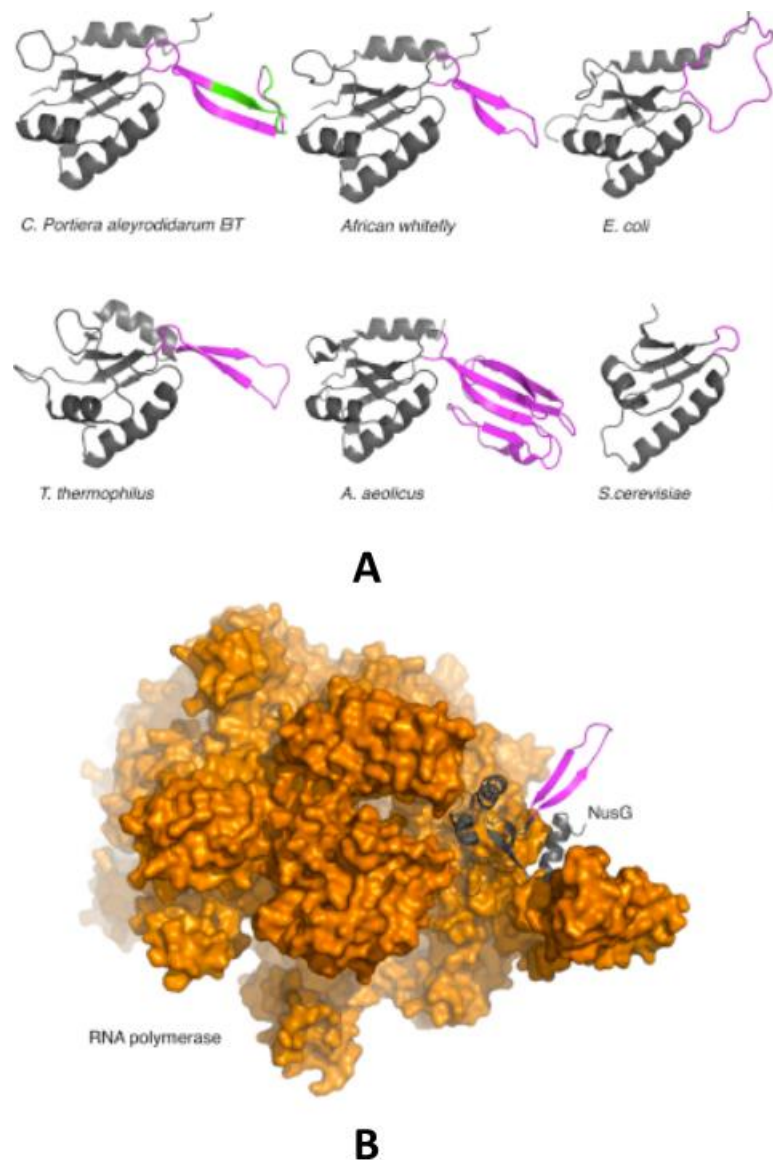

**Fig. 4** Structure analysis of *NusG* from *P. aleyrodidarum* in *B. tabaci* and other endosymbionts **A.** Phyre2 based structure prediction of *NusG* from *Candidatus Portiera aleyrodidarum* in *B. tabaci* SSAI whitefly and comparisons to the structures of *NusG* from other bacterial species as indicated and of Spt4/5 from yeast. *NusG* is coloured in grey, the loop region in magenta and the 11-residue deletion is shown in green in the *C. Portiera aleyrodidarum* structure. **B.** A model of bacterial RNA polymerase (orange surface representation) bound to the N-terminal domain of the *T. thermophilus* *NusG* (grey cartoon representation)
